# Supplementary material
Source: publisher figshare collection journal article supplement (https://frontiersin.figshare.com/ndownloader/files/11570312)
Supplement: Supplementary file [file 11570312]

**Fig. S3. Impact of MSSRFD41 biopriming in root and shoot development of finger millet seeds at 8<sup>th</sup> day.**

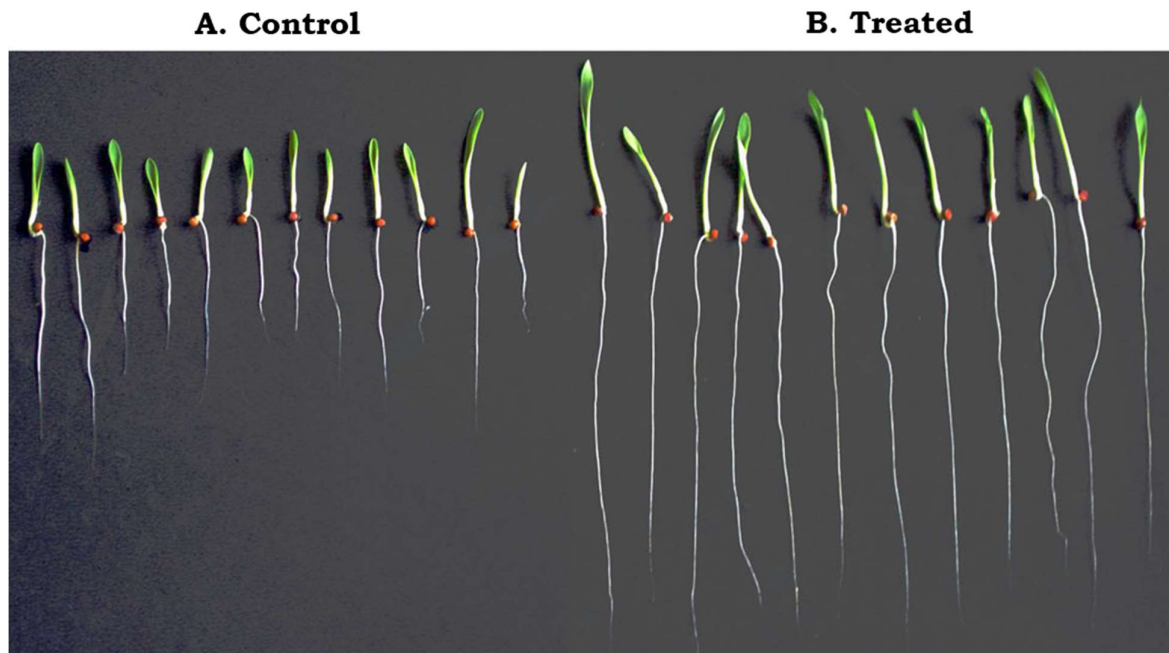

A. Control millet seeds are treated with sterile 0.03 M MgSO<sub>4</sub>, B. MSSRFD41 primed millet seeds which showed enhancement of root and shoot development than control seeds.
